# Supplementary material for: Insight into the regulation between crystallinity and oxygen vacancies of BiVO4 affecting the photocatalytic oxygen evolution activity
Source: Royal Society of Chemistry journal article supplement (doi:10.1039/d2cy00574c), 2022-01-01
Supplement: d2cy00574c1.pdf [file d2cy00574c1.pdf]

## Supporting Information

### The insight of regulation between crystallinity and oxygen vacancy of $\text{BiVO}_4$ affects the photocatalytic oxygen evolution activity

Yaqian Zhang<sup>a</sup>, Wenjun Han<sup>a</sup>, Lingling Ding<sup>a</sup>, Fan Fang<sup>a</sup>, Zhengzheng Xie<sup>a</sup>, Xianglei Liu<sup>b</sup>, Kun Chang<sup>\*a</sup>

<sup>a</sup> Y. Zhang, W. Han, L. Ding, Dr. F. Fang, Dr. Z. Xie, Prof. K. Chang

a. Centre for Hydrogenenergy, College of Materials Science and Technology, Nanjing University of Aeronautics and Astronautics, Nanjing 210016, P. R. China. E-mail: changkun@nuaa.edu.cn

<sup>b</sup> Xianglei Liu

b. College of Energy and Power Engineering, Nanjing University of Aeronautics and Astronautics, Nanjing 210016, P. R. China

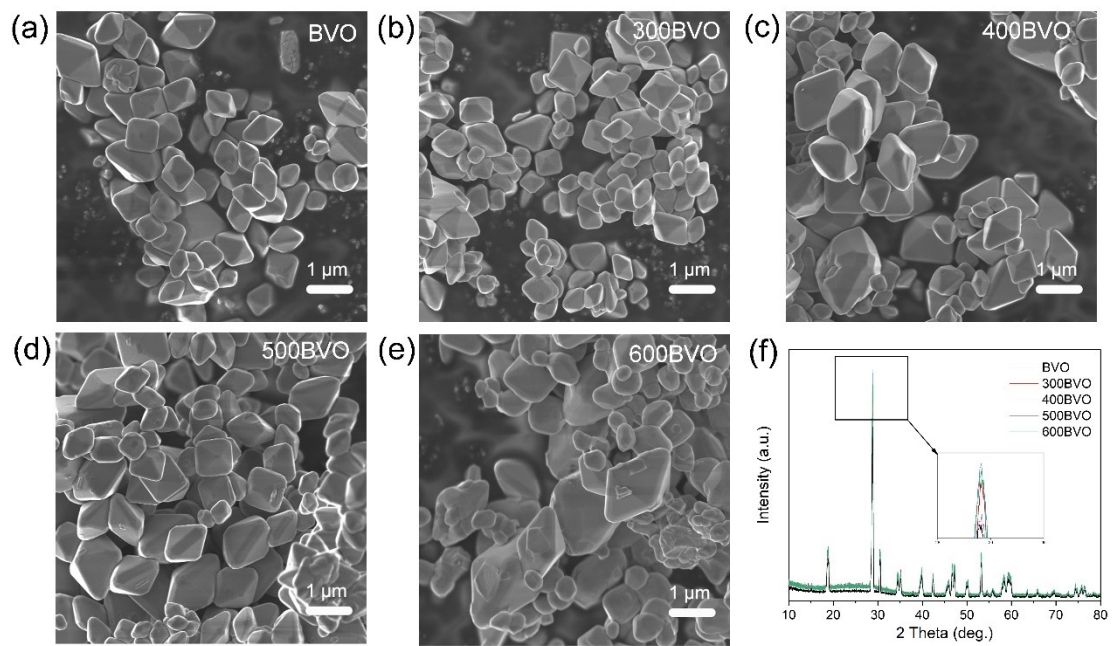

**Fig.S1** (a-d) SEM and (f) XRD of BiVO<sub>4</sub> before and after heat treatment at 300, 400, 500, and 600 °C.

**Table S1.** FWHM and Crystallinity of BiVO<sub>4</sub> before and after heat treatment at 300, 400, 500, and 600 °

|               |         | BVO     | 300BVO  | 400BVO  | 500BVO  | 600BVO  |
|---------------|---------|---------|---------|---------|---------|---------|
| FWHM          | ( 112 ) | 0.33819 | 0.3297  | 0.31507 | 0.33279 | 0.33804 |
|               | ( 011 ) | 0.54841 | 0.41661 | 0.38024 | 0.51415 | 0.56290 |
| Crystallinity |         | 70.47%  | 70.64%  | 98.42%  | 71.85%  | 68.63%  |

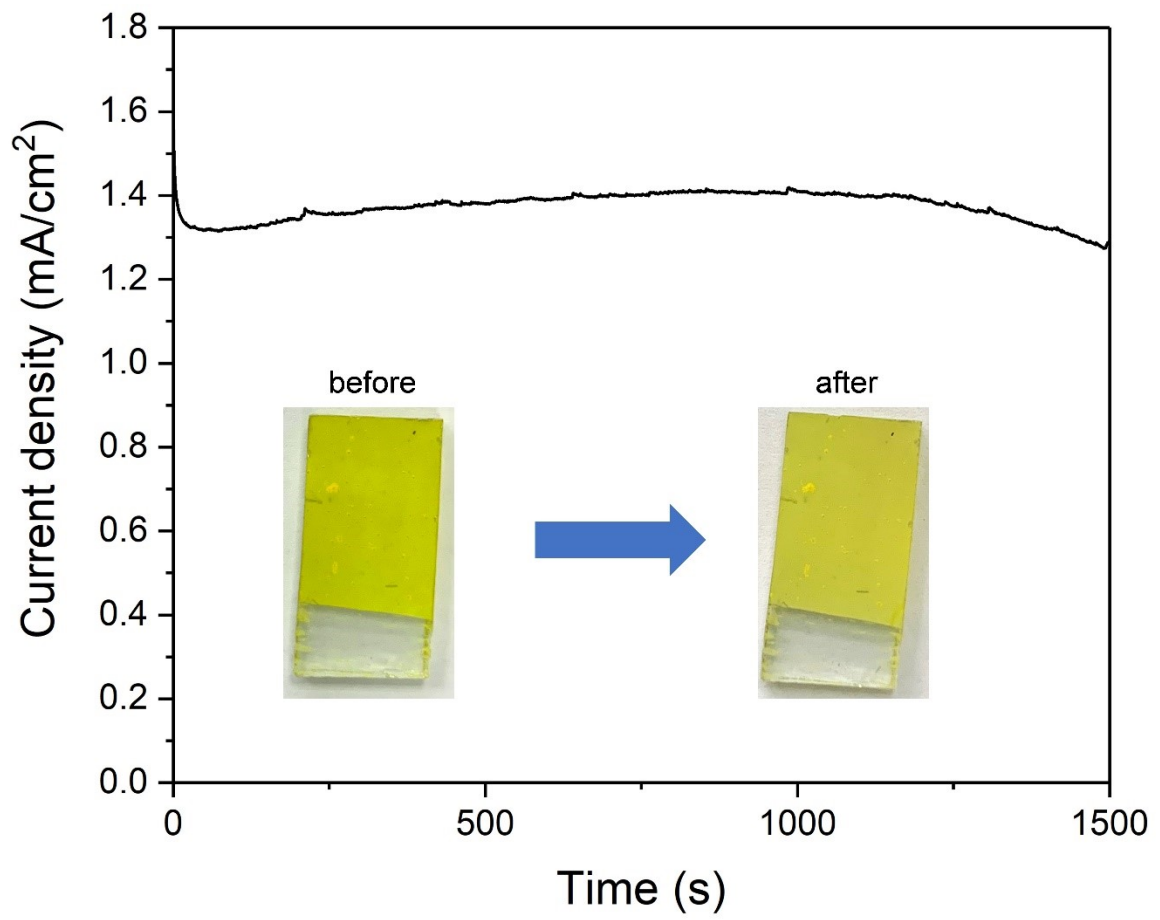

Fig.S2 i-t test of 400BVO film.

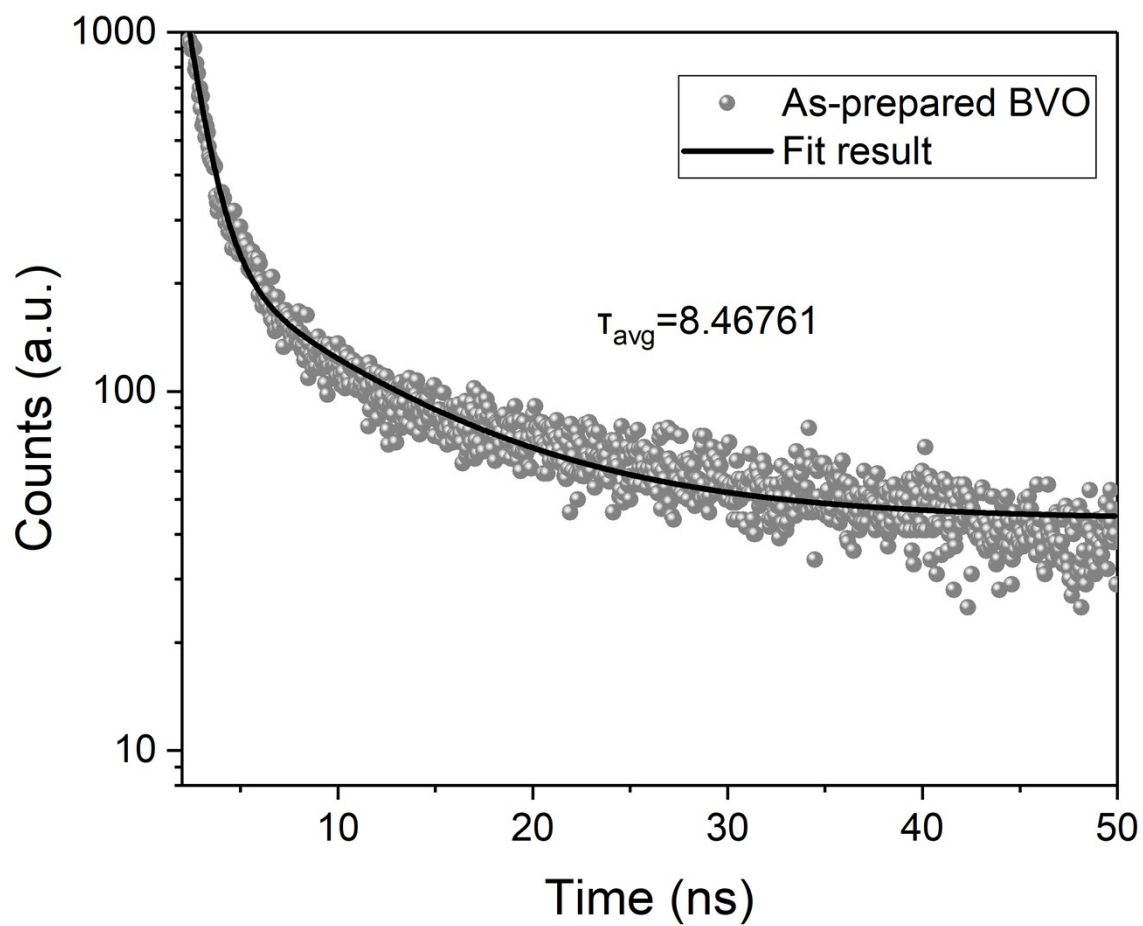

**Fig.S3** The fluorescence lifetime of BiVO<sub>4</sub> before heat treatment at 300, 500, and 600 °C.

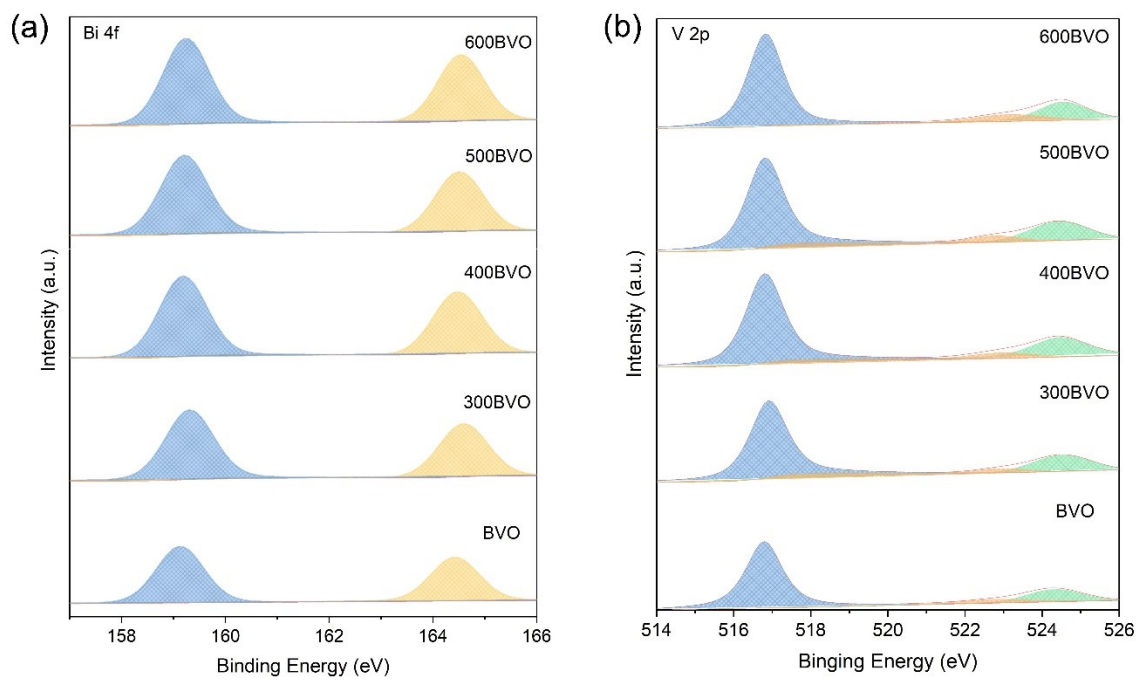

**Fig. S4** The XPS spectra of BiVO<sub>4</sub> before and after O<sub>2</sub> heat treatment at 300, 400, 500, and 600 °C: (a) Bi 4f, (b) V 2p.

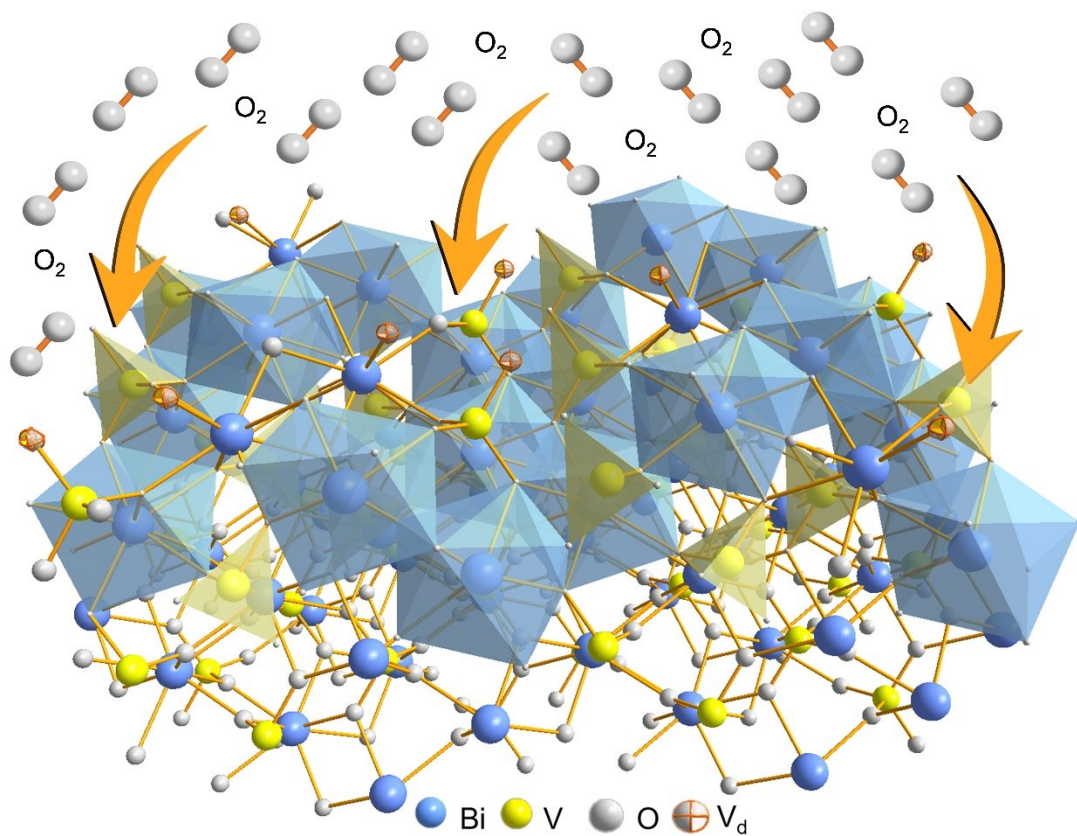

Fig. S5 Schematic illustration of the oxygen defect recombination process.

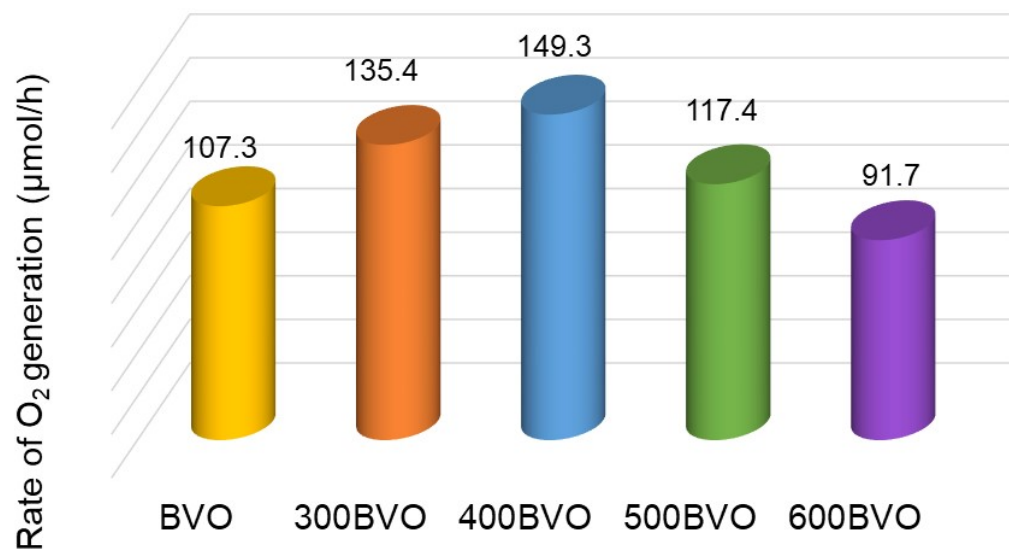

Fig. S6 Photocatalytic rate of O<sub>2</sub> generation in Fe<sub>2</sub>(SO<sub>4</sub>)<sub>3</sub>.



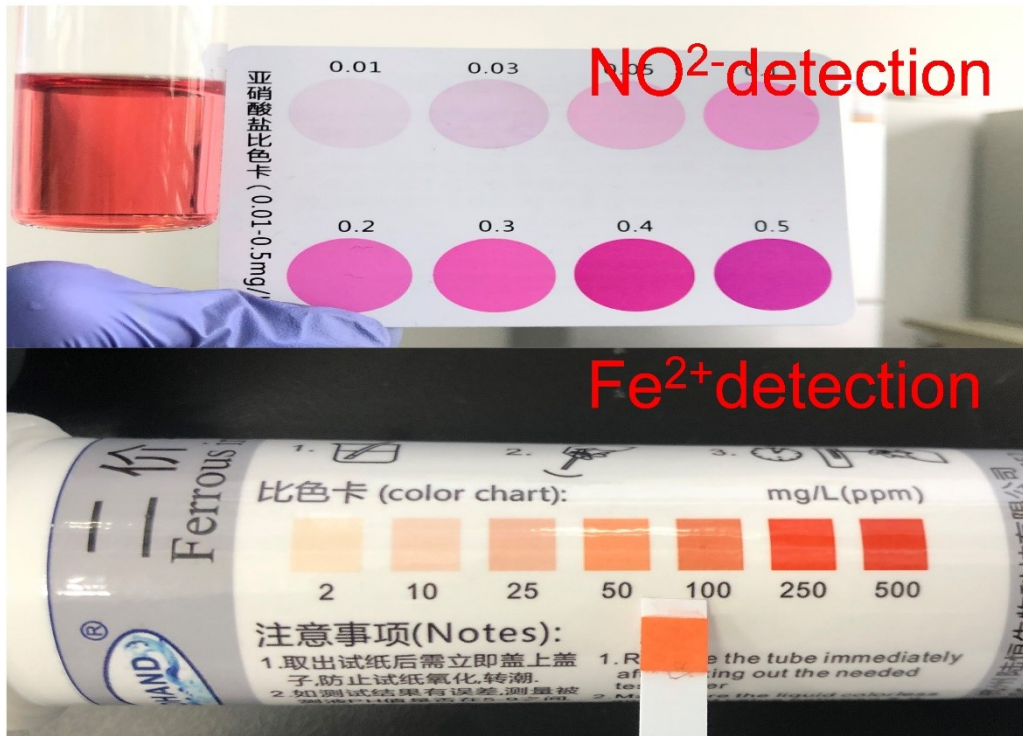

Fig.S7 The chromogenic reaction of NO<sub>2</sub><sup>-</sup> and Fe<sup>2+</sup>.

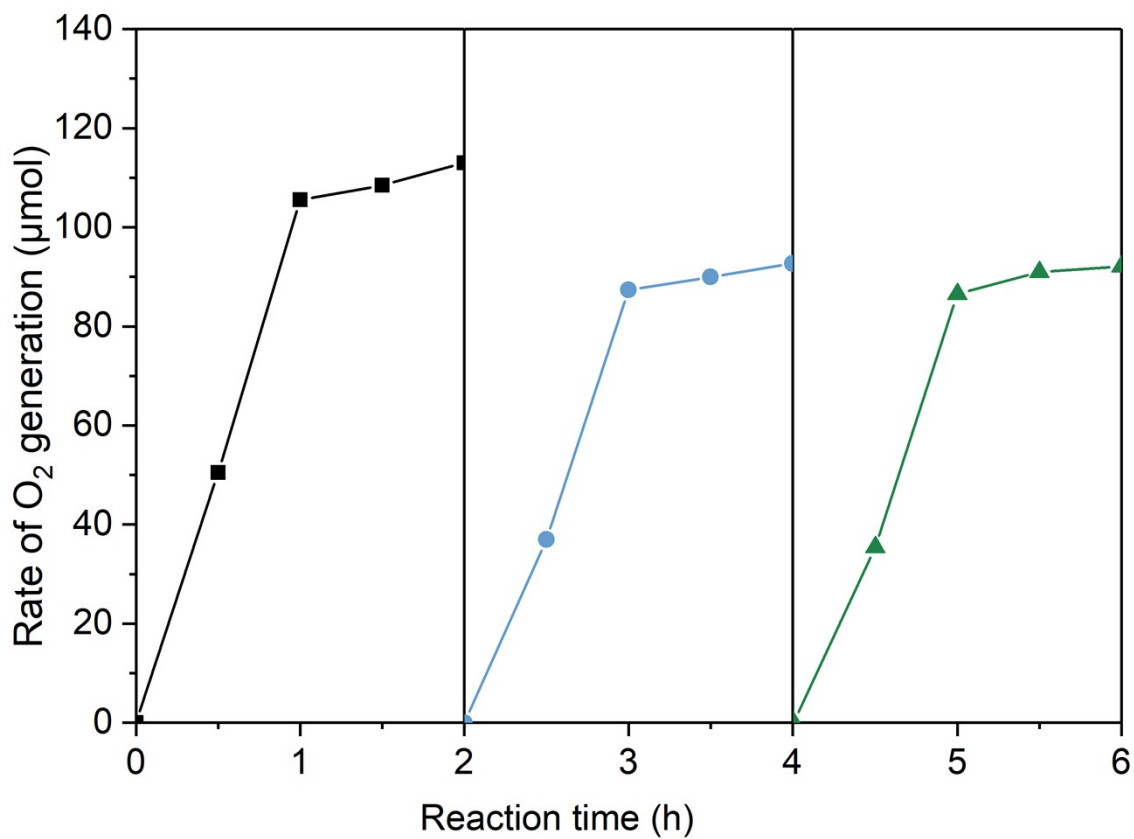

**Fig. S8** The recyclability experiments in  $\text{Fe}_2(\text{SO}_4)_3$  solution.

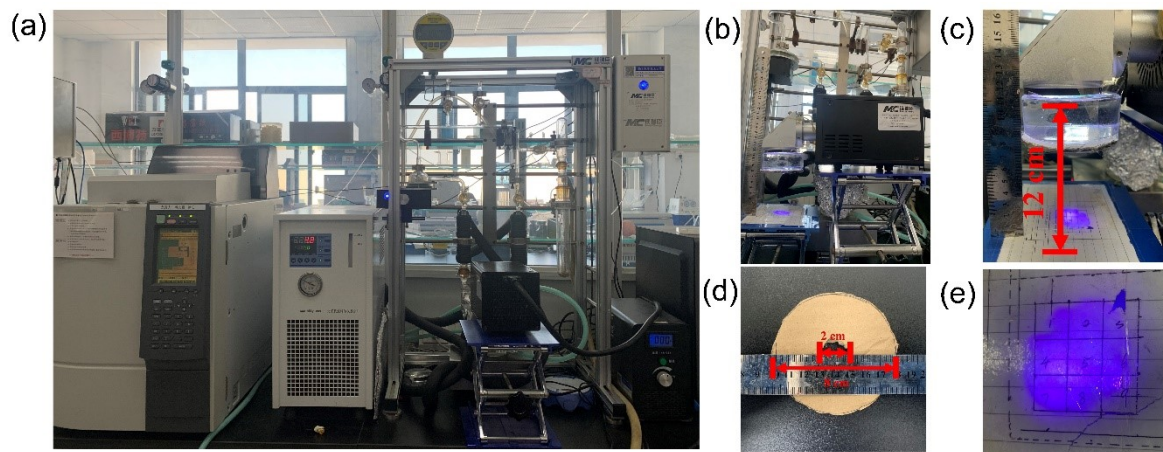

**Fig.S9** The testing of water splitting research and AQY test: (a) An automatic injection circulation system. (b) and (c) The distance between the light intensity detector and the emission center of the lamp source is 12 cm. (d) 420 nm monochromatic filter with a diameter 2 cm. (e) light spot with a diameter 3 cm.

**Table S2.** The AQY test data of 400BVO.

| $\lambda$ (nm) | Rate of O <sub>2</sub> ( $\mu\text{mol}/\text{cm}^2$ ) | I (mW/cm <sup>2</sup> ) | AQY (%) |
|----------------|--------------------------------------------------------|-------------------------|---------|
| 365            | 0.154                                                  | 2.8                     | 38.29   |
| 420            | 0.1268                                                 | 2.65                    | 28.87   |
| 450            | 0.1067                                                 | 2.2                     | 27.36   |
| 500            | 0.0821                                                 | 2.24                    | 18.65   |
| 550            | 0.0295                                                 | 2.18                    | 6.25    |

Calculating AQY according to the following equations:

$$\text{AQY}(\%) = \frac{\text{Number of reacted electrons}}{\text{Number of incident photons}} \times 100\%$$

$$= \frac{\text{Number of evolved O}_2 \text{ molecules} \times 4}{\text{Number of incident photons}} \times 100\%$$

$$= \frac{\mu\text{mol} \times N_A \times 10^{-6} \times 4}{\frac{I \times A \times t}{E_g \times J}} \times 100\%$$

In which  $N_A = 6.02 \times 10^{23}$ ,  $E_g = 1240/\lambda$ , ( $\lambda=420\text{nm}$ ),  $A$  (area) = 3.14 cm<sup>2</sup>,  $t$  (time) = 60 s,  $J = 1.6 \times 10^{-19}$  j.

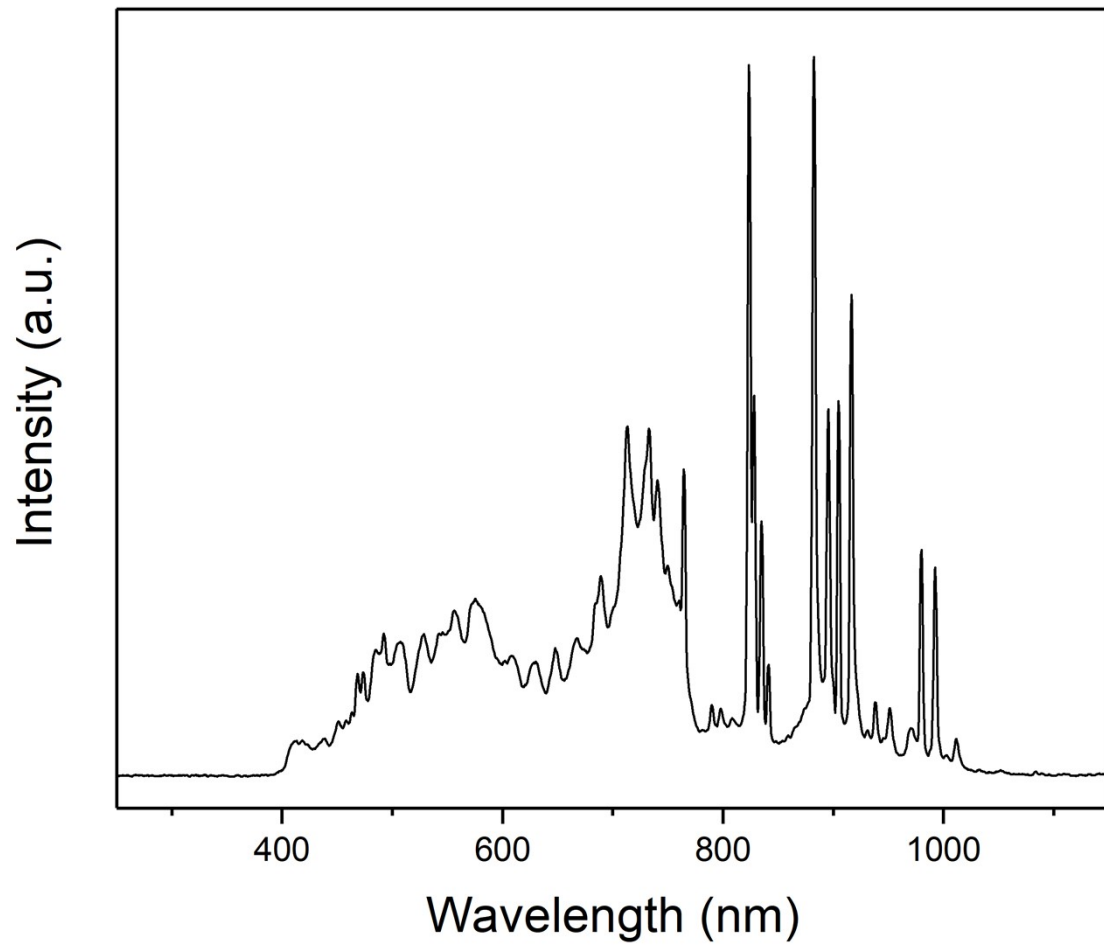

**Fig.S10** The spectrum of the 300 W Xenon lamp equipped with CUT 420 nm monochromatic filter.
